# Supplementary material
Source: PubMed Central journal article supplement (PMC3288338)

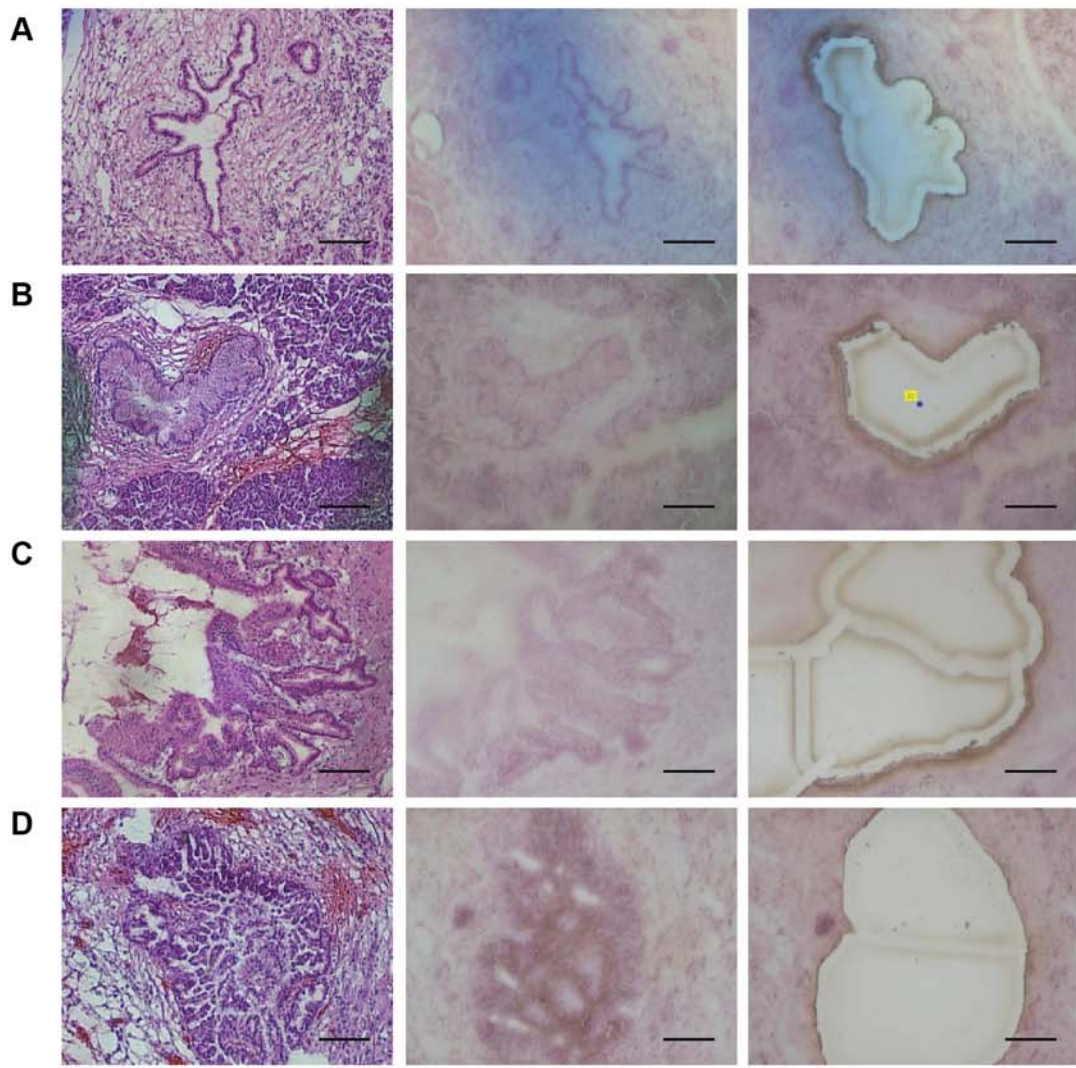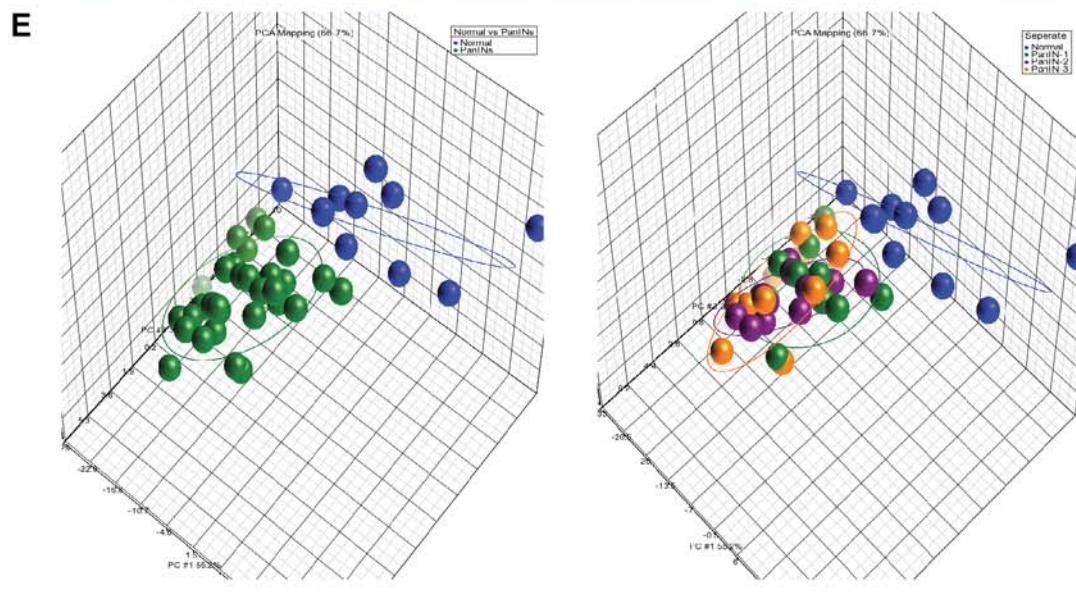

Supplement: NIHMS340284-supplement-5.pdf [file NIHMS340284-supplement-5.pdf]
